# Supplementary material for: Oriented attachment of ultra-small Mn(1−x)ZnxFe2O4nanoparticles during the non-aqueous sol–gel synthesis
Source: Royal Society of Chemistry journal article supplement (doi:10.1039/c4ce02068e), 2014-12-04
Supplement: c4ce02068e1.pdf [file c4ce02068e1.pdf]

**Supporting information section**  
**Oriented attachment of ultra-small  $\text{Mn}_{(1-x)}\text{Zn}_x\text{Fe}_2\text{O}_4$  nanoparticles during the non-aqueous sol-gel synthesis**

CrystEngComm

I.-C. Masthoff and G. Garnweitner  
Institute for Particle Technology  
Technische Universität Braunschweig  
Volkmaroder Str. 5, 38104 Braunschweig  
g.garnweitner@tu-bs.de

A. Gutsche, H. Nirschl  
Institute for Mechanical Process Engineering and Mechanics  
Karlsruhe Institute of Technology  
Strasse am Forum 8, 76131 Karlsruhe

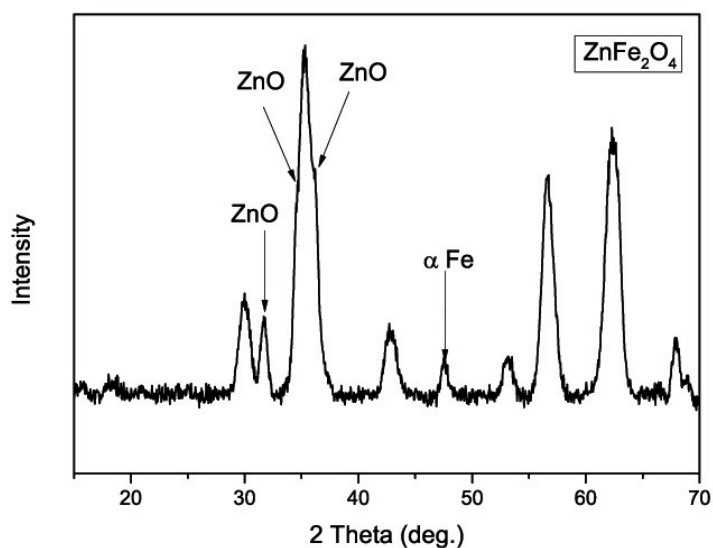

Figure 1: XRD pattern of  $\text{ZnFe}_2\text{O}_4$  particles synthesized with  $\text{Zn}(\text{acac})_{\text{hyd}}$  as precursor.

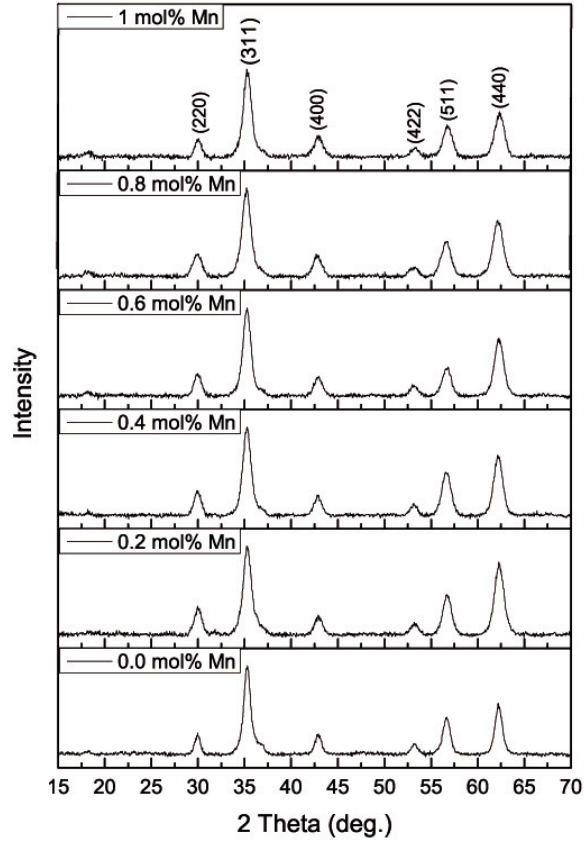

Figure 2: XRD patterns of the samples after calcination at 400°C for 2 h in a nitrogen atmosphere.

Table 1: Crystallite size of the dried particle samples calculated with the Scherrer equation.

| sample                                                | crystallite size [nm] |
|-------------------------------------------------------|-----------------------|
| $\text{MnFe}_2\text{O}_4$                             | 5.56                  |
| $\text{Mn}_{0.8}\text{Zn}_{0.2}\text{Fe}_2\text{O}_4$ | 5.31                  |
| $\text{Mn}_{0.6}\text{Zn}_{0.4}\text{Fe}_2\text{O}_4$ | 4.85                  |
| $\text{Mn}_{0.4}\text{Zn}_{0.6}\text{Fe}_2\text{O}_4$ | 5.87                  |
| $\text{Mn}_{0.2}\text{Zn}_{0.8}\text{Fe}_2\text{O}_4$ | 6.02                  |
| $\text{ZnFe}_2\text{O}_4$                             | 8.77                  |

Table 2: Crystallite size of the samples after calcination at 400°C for 2 h in a nitrogen atmosphere calculated with the Scherrer equation.

| sample                                                | size calcinated [nm] |
|-------------------------------------------------------|----------------------|
| $\text{MnFe}_2\text{O}_4$                             | 8.59                 |
| $\text{Mn}_{0.8}\text{Zn}_{0.2}\text{Fe}_2\text{O}_4$ | 8.33                 |
| $\text{Mn}_{0.6}\text{Zn}_{0.4}\text{Fe}_2\text{O}_4$ | 8.96                 |
| $\text{Mn}_{0.4}\text{Zn}_{0.6}\text{Fe}_2\text{O}_4$ | 8.87                 |
| $\text{Mn}_{0.2}\text{Zn}_{0.8}\text{Fe}_2\text{O}_4$ | 8.41                 |
| $\text{ZnFe}_2\text{O}_4$                             | 11.11                |

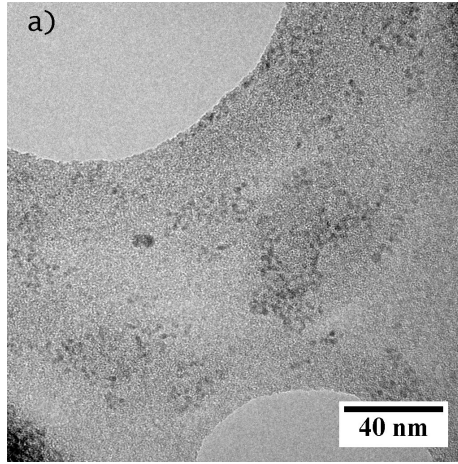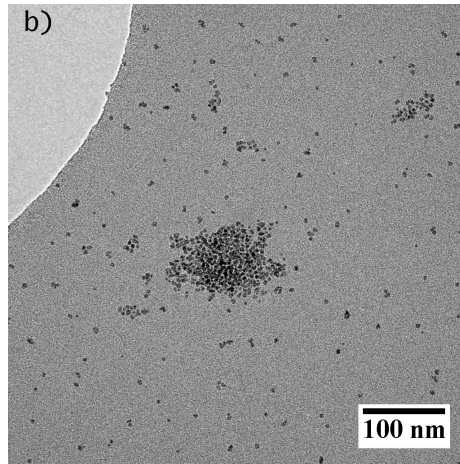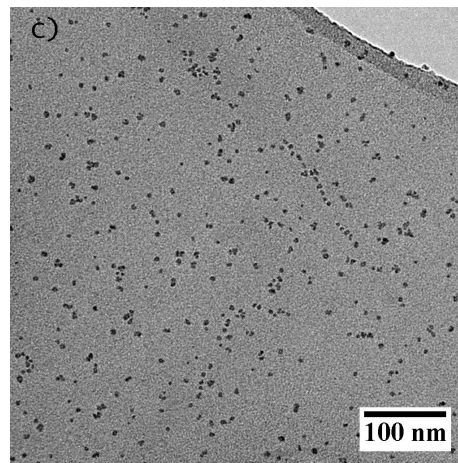

Figure 3: TEM images of the samples with  $t_R = 2$  h (a),  $t_R = 8$  h (b) and (c)  $t_R = 14$  h.

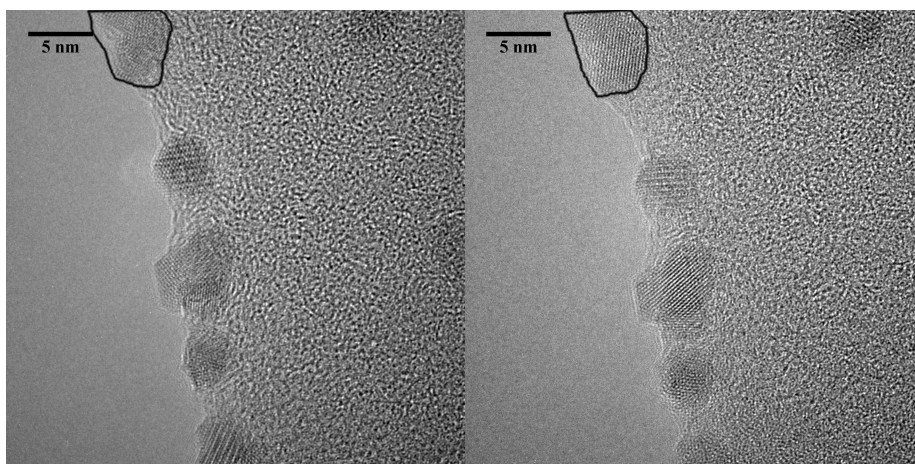

Figure 4: In situ TEM observation of oriented attachment of  $\text{Mn}_{0.6}\text{Zn}_{0.4}\text{Fe}_2\text{O}_4$  nanoparticles. The images were taken at an interval of 5 minutes.

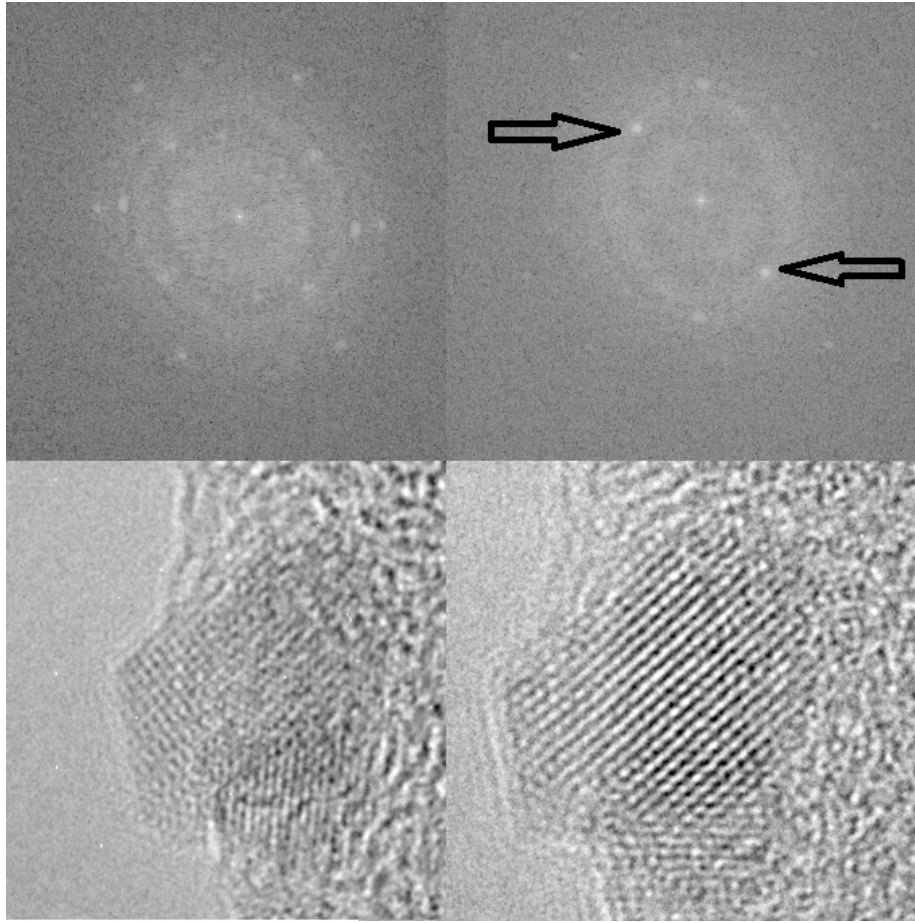

Figure 5: FFT images of the  $\text{Mn}_{0.6}\text{Zn}_{0.4}\text{Fe}_2\text{O}_4$  nanoparticles during the oriented attachment. The crystallographic plane 311 with the d-spacing of 0.25 nm shows an increased resolution after the oriented attachment of the particles. Therefore we inferred that the 311 plane is the preferred orientation direction.

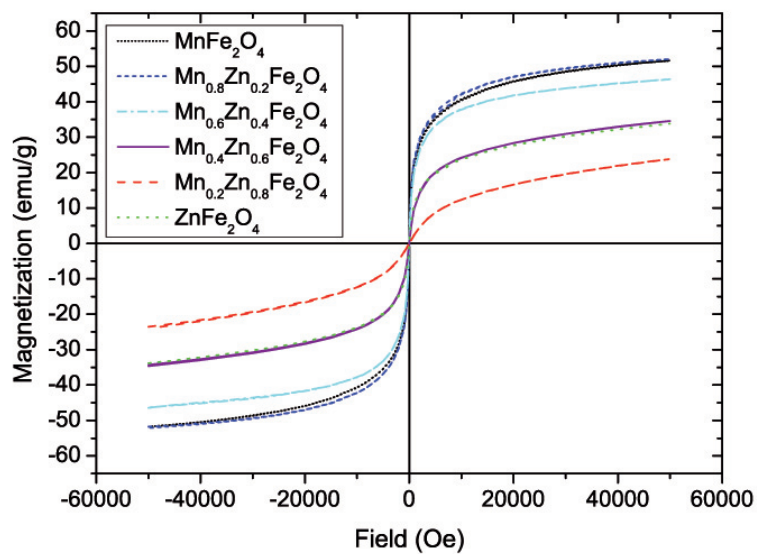

Figure 6: Hysteresis loops of the samples after calcination at 400°C for 2h in a nitrogen atmosphere.
